# Supplementary material for: Quality of life during first-line FOLFOX4±panitumumab in RAS wild-type metastatic colorectal carcinoma: results from a randomised controlled trial
Source: PubMed Central journal article supplement — ESMO Open. 2016 Mar 31;1(2):e000041. doi: 10.1136/esmoopen-2016-000041 (PMC5070244; doi:10.1136/esmoopen-2016-000041), 2016-03-31
Supplement: esmoopen-2016-000041supp.pdf [file esmoopen-2016-000041supp.pdf]

Supplementary Figure 1

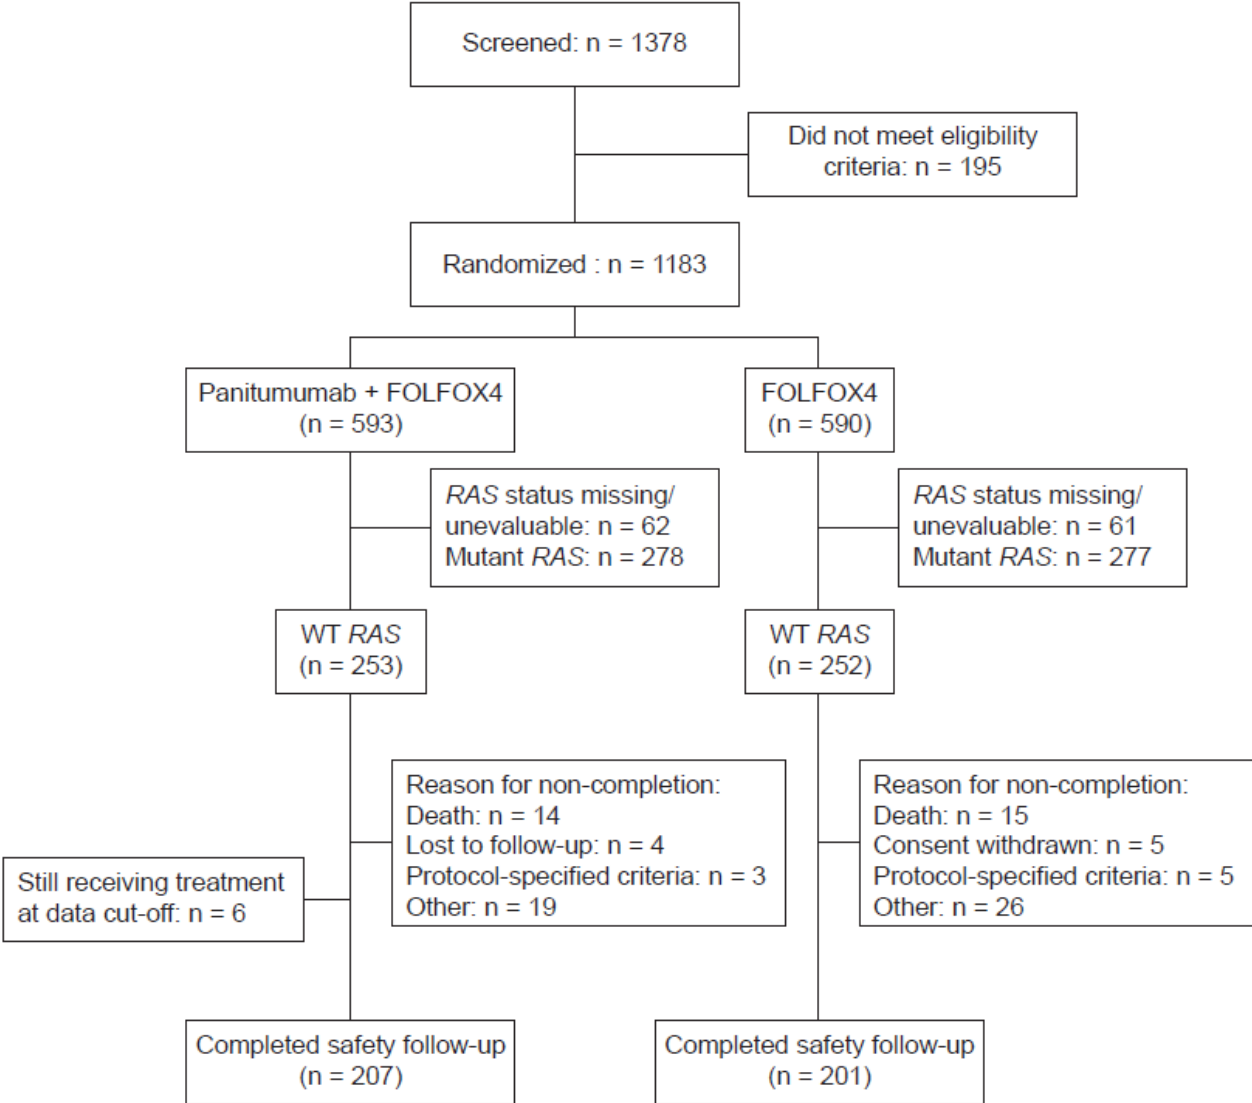

**Supplementary Table 1. Baseline demographics and disease characteristics**

|                                    | <b>Panitumumab + FOLFOX4</b> | <b>FOLFOX4</b>       |
|------------------------------------|------------------------------|----------------------|
|                                    | <b>(n = 253)</b>             | <b>(n = 252)</b>     |
| Sex                                |                              |                      |
| Male                               | 170 (67)                     | 158 (63)             |
| Female                             | 83 (33)                      | 94 (37)              |
| Age (years), median (range)        | 61 (27–81)                   | 61 (24–82)           |
| ECOG performance score, n (%)      |                              |                      |
| 0 or 1                             | 238 (94)                     | 235 (93)             |
| 2                                  | 15 (6)                       | 17 (7)               |
| Primary tumour diagnosis, n (%)    |                              |                      |
| Colon                              | 165 (65)                     | 164 (65)             |
| Rectum                             | 88 (35)                      | 88 (35)              |
| Prior adjuvant chemotherapy, n (%) |                              |                      |
| Yes                                | 42 (17)                      | 38 (15)              |
| No                                 | 211 (83)                     | 214 (85)             |
| Median EuroQoL score (range)       |                              |                      |
| Health State Index                 | 0.796 (–0.484, 1.00)         | 0.796 (–0.005, 1.00) |
| Overall Health Rating              | 77.0 (0.0, 100)              | 70.0 (6.0, 100)      |

Abbreviations: ECOG = Eastern Cooperative Oncology Group; EQ-5D, EuroQoL 5-domain.

**Supplementary Table 2. Skin toxicity adverse events (any grade) occurring in  $\geq 5\%$  of patients in either treatment arm**

| <b>Adverse event, n (%)</b>                | <b>Panitumumab + FOLFOX4<br/>(n = 253)</b> | <b>FOLFOX4<br/>(n = 252)</b> |
|--------------------------------------------|--------------------------------------------|------------------------------|
| Rash                                       | 139 (56)                                   | 20 (8)                       |
| Dermatitis acneiform                       | 85 (34)                                    | 0 (0)                        |
| Pruritus                                   | 64 (26)                                    | 11 (4)                       |
| Dry skin                                   | 56 (22)                                    | 13 (5)                       |
| Erythema                                   | 42 (17)                                    | 9 (4)                        |
| Skin fissures                              | 42 (17)                                    | 1 (<1)                       |
| Acne                                       | 37 (15)                                    | 1 (<1)                       |
| Palmar-plantar erythrodysesthesia syndrome | 27 (11)                                    | 7 (3)                        |
